# Supplementary material for: Preparedness for Life-Threatening Situations in a Pediatric Tertiary-Care University Children’s Hospital: A Survey
Source: MDPI journal article supplement (doi:10.3390/children9020271), 2022-02-16
Supplement: s1 [file s1]

## Supplementary material

### Survey instrument

- Q1 How many years of professional experience does your career cover ?
- a) <1y
  - b) 1-5y
  - c) 6-10y
  - d) >10y
- Q2 How long have you been working at the University Children's Hospital of Berne?
- a) <1y
  - b) 1-5y
  - c) 6-10y
  - d) >10y
- Q3 On average, how many hours a week do you work at the University Children's Hospital of Berne?
- a) <20 h/W
  - b) 20-39 h/W
  - c) >40 h/W
- Q4 Approximately, how often do you encounter life threatening situations in your clinical routine ?
- a) Daily
  - b) Weekly
  - c) About once a month
  - d) Every 2 to 6 months
  - e) About once a year
  - f) Less than once a year or never
- Q5 How do you rate your ability to recognize a child's deteriorating condition ?
- a) very good
  - b) good
  - c) satisfactory
  - d) poor
  - e) very poor
- Q6 In theory, how well prepared do you feel to partake in an emergency requiring resuscitation?
- a) Very well
  - b) Well
  - c) Satisfactory
  - d) Poor
  - e) Very poor
- Q7 How well prepared do you feel to actively partake in an emergency requiring resuscitation?

- a) Very well
- b) Well
- c) Satisfactory
- d) Poor
- e) Very poor

Q8 I feel comfortable operating medical devices used in my work environment.

- a) strongly agree
- b) agree
- c) unsure/I do not know
- d) disagree
- e) strongly disagree

Q9 I would feel comfortable having my child treated where I work.

- a) strongly agree
- b) agree
- c) neutral
- d) disagree
- e) strongly disagree

Q10 Which of the following medical emergencies and skills would you like to receive specific training? (multiple replies are possible)

- a) Arrhythmias
- b) Multisystem trauma
- c) Airway management
- d) Shock
- e) Cardiac arrest
- f) Seizures
- g) Head trauma
- h) Chest compressions
- i) Bag mask ventilation
- j) Severe dehydration
- k) Meningitis
- l) Prescribing and/or administering emergency drugs
